# Supplementary material
Source: Springer Nature journal article supplement (https://www.springermedizin.de/resource/supplementary/12879_2004_158_MOESM10_ESM.pdf/9448276)

**Groups with rabies per 1000**

**runs**

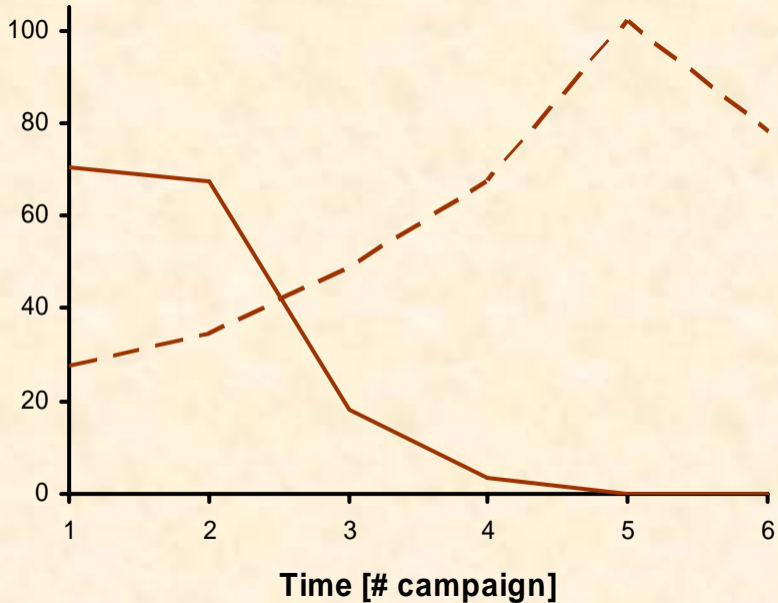

Supplement: MOESM10 [file 9448276]
